# Supplementary material for: Effect of Essential oil Components on the Activity of Steroidogenic Cytochromes P450
Source: Preprints.org preprint supplement (doi:10.20944/preprints202311.0063.v2), 2024-01-29
Supplement: Supplementary file 1 [file supplementary]

## Sheet: all_best_scores
	SDF file name	Molecule name	PubChem CID		SP 3N9Y	SP 3SWZ	SP 3S79	SP 4Y8W		XP 3N9Y	XP 3SWZ	XP 3S79	XP 4Y8W		Sum
	1742210_Caryophyllene-oxide	Caryophyllene-oxide	1742210		-7.55	-7.11	-8.249	-7.431		-5.975	-5.439	-6.03	-7.374		-55.158
	65575_plus-Cedrol	plus-Cedrol	65575		-7.118	-6.821	-8.185	-7.342		-6.382	-5.308	-5.957	-6.302		-53.415
	11858788_Epiglobulol	Epiglobulol	11858788		-7.062	-6.45	-8.094	-7.395		-5.487	-4.932	-6.138	-7.045		-52.603
	1549992_ Bisabolol	Bisabolol	1549992		-7.3	-5.446	-6.42	-7.065		-5.125	-5.602	-5.813	-7.882		-50.653
	6989_Thymol	Thymol	6989		-6.905	-6.828	-6.608	-6.766		-5.487	-5.049	-4.226	-5.32		-47.189
	10364_Carvacrol	Carvacrol	10364		-7.284	-6.13	-6.9	-7.245		-3.66	-5.367	-5.029	-5.474		-47.089
	15406_Fenchol	Fenchol	15406		-6.937	-5.979	-6.578	-6.101		-4.897	-4.493	-6.213	-5.443		-46.641
	14896_beta-Pinene	beta-Pinene	14896		-6.237	-6.303	-6.824	-6.265		-5.173	-4.564	-5.391	-5.657		-46.414
	87839_S-cis-Verbenol	S-cis-Verbenol	87839		-7.201	-5.816	-6.058	-6.131		-5.423	-4.381	-6.472	-4.841		-46.323
	519382_Dihydro-beta-ionone	Dihydro-beta-ionone	519382		-6.179	-5.605	-6.102	-5.766		-5.297	-4.92	-6.464	-5.89		-46.223
	16666_L-Menthol	L-Menthol	16666		-6.549	-6.2	-6.581	-6.334		-4.799	-4.523	-5.645	-5.356		-45.987
	62346_Bisabolene	Bisabolene	62346		-6.196	-6.18	-6.791	-6.53		-5.245	-5.303	-2.552	-6.641		-45.438
	7463_p-Cymene	p-Cymene	7463		-6.152	-6.317	-6.712	-6.313		-4.852	-4.518	-5.522	-4.618		-45.004
	443162_S-minus-alpha-Terpineol	S-minus-alpha-Terpineol	443162		-6.61	-5.897	-5.751	-5.732		-4.883	-4.375	-5.652	-5.842		-44.742
	10887971_plus-Sabinene	plus-Sabinene	10887971		-6.332	-6.202	-6.579	-6.173		-4.829	-4.23	-4.644	-5.702		-44.691
	440968_minus-alpha-Pinene	minus-alpha-Pinene	440968		-6.177	-6.071	-6.559	-6.065		-5.221	-4.337	-5.023	-5.147		-44.6
	11463_Terpinolene	Terpinolene	11463		-5.979	-6.253	-6.556	-6.04		-4.599	-4.352	-5.02	-5.662		-44.461
	111037_alpha-Terpinyl-acetate	alpha-Terpinyl-acetate	111037		-5.827	-5.258	-6.972	-5.577		-5.241	-4.931	-5.189	-5.415		-44.41
	1201518_L-Borneol	L-Borneol	1201518		-6.826	-5.612	-6.567	-6.373		-2.919	-4.477	-7.07	-4.559		-44.403
	7460_alpha-Fellandrene	alpha-Fellandrene	7460		-6.174	-6.288	-6.68	-5.931		-4.33	-4.374	-5.191	-5.374		-44.342
	7461_gamma-Terpinene	gamma-Terpinene	7461		-6.365	-6.204	-6.624	-6.26		-4.413	-4.398	-5.462	-4.399		-44.125
	6616_Camphene	Camphene	6616		-6.039	-6.231	-6.782	-6.178		-4.387	-4.389	-5.362	-4.578		-43.946
	1183_Vanillin	Vanillin	1183		-5.916	-5.892	-6.705	-5.658		-4.783	-4.831	-5.701	-4.394		-43.88
	442501_R-plus-alpha-Terpineol	R-plus-alpha-Terpineol	442501		-6.442	-5.913	-6.096	-5.721		-3.327	-4.366	-5.189	-6.434		-43.488
	31244_p-Anisaldehyde	p-Anisaldehyde	31244		-6.132	-5.733	-6.708	-5.743		-5.281	-3.751	-5.422	-4.646		-43.416
	82227_plus-alpha-Pinene	plus-alpha-Pinene	82227		-6.102	-5.976	-6.451	-6.039		-5.064	-4.181	-5.101	-4.452		-43.366
	82227_plus-alpha-Pinene	plus-alpha-Pinene	82227		-5.714	-5.88	-6.467	-6.041		-4.809	-4.175	-5.24	-4.982		-43.308
	10819_Perillyl-alcohol	Perillyl-alcohol	10819		-5.844	-5.399	-5.317	-4.93		-5.417	-5.317	-5.982	-5.014		-43.22
	3033866_Z-gamma-bisabolene	Z-gamma-bisabolene	3033866		-5.702	-6.179	-6.769	-6.086		-5.275	-5.186	-1.747	-6.032		-42.976
	443156_1S3R-plus-3-Carene	1S3R-plus-3-Carene	443156		-5.134	-6.162	-6.534	-6.016		-4.872	-4.18	-5.098	-4.88		-42.876
	11788398_plus-Perillyl-alcohol	plus-Perillyl-alcohol	11788398		-5.716	-5.326	-5.551	-4.417		-5.79	-5.335	-5.938	-4.674		-42.747
	638014_beta-Ionone	beta-Ionone	638014		-6.144	-5.241	-6.006	-5.833		-4.785	-4.945	-5.135	-4.525		-42.614
	443181_cis-Dihydrocarvone	cis-Dihydrocarvone	443181		-5.999	-5.559	-5.57	-5.245		-5.471	-4.223	-5.612	-4.615		-42.294
	444539_E-Cinnamic-acid	E-Cinnamic-acid	444539		-5.358	-4.744	-5.332	-4.474		-5.48	-4.555	-6.063	-6.234		-42.24
	11051711_1S5S-minus-Sabinene	1S5S-minus-Sabinene	11051711		-6.367	-6.021	-6.604	-5.979		-4.531	-4.311	-4.058	-4.35		-42.221
	442461_1R6S-minus-3-Carene	1R6S-minus-3-Carene	442461		-5.319	-6.023	-6.638	-5.922		-4.68	-4.134	-5.076	-4.331		-42.123
	5282108_E-alpha-Ionone	E-alpha-Ionone	5282108		-5.901	-5.684	-6.488	-5.82		-5.161	-4.76	-2.495	-5.752		-42.061
	2187_Anastrozole	Anastrozole	2187		-5.467	-5.221	-6.622	-6.212		-5.966	-4.824	-3.209	-4.534		-42.055
	440967_1S5S-minus-beta-Pinene	1S5S-minus-beta-Pinene	440967		-5.464	-6.335	-6.803	-5.975		-4.207	-4.57	-4.38	-4.258		-41.992
	1201529_minus-Myrtenal	minus-Myrtenal	1201529		-6.292	-5.898	-6.451	-6.085		-4.546	-4.318	-5.659	-2.432		-41.681
	5315892_E-Cinnamyl-alcohol	E-Cinnamyl-alcohol	5315892		-5.276	-5.026	-4.848	-4.732		-4.808	-5.059	-5.489	-6.277		-41.515
	8635_Methyl-anthranilate	Methyl-anthranilate	8635		-5.811	-5.353	-5.487	-5.292		-4.761	-4.327	-5.136	-5.131		-41.298
	439570_R-minus-Carvone	R-minus-Carvone	439570		-5.731	-4.549	-5.668	-5.385		-5.197	-4.389	-5.418	-4.93		-41.267
	2758_Eucalyptol	Eucalyptol	2758		-6.143	-6.174	-6.747	-4.721		-4.892	-4.137	-5.435	-2.99		-41.239
	5282108_E-alpha-Ionone	E-alpha-Ionone	5282108		-6.065	-5.344	-5.767	-5.615		-4.615	-4.314	-4.371	-4.984		-41.075
	31244_4-Methoxybenzaldehyde	4-Methoxybenzaldehyde	31244		-5.517	-5.683	-6.649	-4.896		-4.274	-3.764	-5.425	-4.582		-40.79
	4133_Methyl-Salicylate	Methyl-Salicylate	4133		-5.587	-5.503	-5.224	-5.073		-4.673	-4.589	-5.05	-5.029		-40.728
	159055_R-plus-Camphor	R-plus-Camphor	159055		-6.065	-5.481	-6.35	-5.654		-4.173	-3.985	-4.24	-4.282		-40.23
	440968_minus-alpha-Pinene	minus-alpha-Pinene	440968		-5.501	-5.773	-6.558	-5.758		-3.809	-4.244	-4.063	-4.398		-40.104
	8785_Benzyl-acetate	Benzyl-acetate	8785		-5.707	-5.662	-5.683	-5.617		-4.314	-4.226	-3.76	-5.115		-40.084
	7462_alpha-Terpinene	alpha-Terpinene	7462		-6.244	-6.242	-6.464	-6.378		-4.573	-4.477	-0.957	-4.61		-39.945
	10106_14-Cineole	14-Cineole	10106		-5.944	-5.873	-6.498	-5.118		-4.883	-4.194	-3.869	-3.374		-39.753
	2724159_S-minus-Perillaldehyde	S-minus-Perillaldehyde	2724159		-4.621	-5.076	-6.922	-4.559		-4.466	-4.239	-4.457	-5.366		-39.706
	5356544_3S6Z-Nerolidol	3S6Z-Nerolidol	5356544		-4.04	-2.504	-3.35	-2.489		-7.488	-5.571	-7.1	-6.71		-39.252
	440917_R-plus-Limonene	R-plus-Limonene	440917		-5.592	-5.42	-5.476	-5.559		-4.36	-3.954	-3.441	-4.72		-38.522
	10887971_1R5R-plus-Sabinene	1R5R-plus-Sabinene	10887971		-6.275	-6.082	-6.354	-6.183		-4.308	-4.197	-0.714	-4.374		-38.487
	240_Benzaldehyde	Benzaldehyde	240		-5.809	-5.483	-5.16	-5.248		-4.586	-3.308	-4.807	-3.267		-37.668
	7438_minus-Carveol	minus-Carveol	7438		-6.351	-4.898	-5.101	-5.881		-3.145	-5.096	-1.336	-5.438		-37.246
	445070_EE-Farnesol	EE-Farnesol	445070		-4.225	-4.704	-3.851	-2.455		-6.116	-4.458	-3.073	-7.622		-36.504
	637566_E-Geraniol	E-Geraniol	637566		-4.549	-3.243	-4.74	-3.549		-4.732	-4.863	-4.733	-5.885		-36.294
	6549_R-Linalool	R-Linalool	6549		-4.396	-3.505	-4.271	-3.682		-4.271	-4.295	-5.381	-5.66		-35.461
	5281525_3S6E-Nerolidol	3S6E-Nerolidol	5281525		-3.439	-2.555	-3.065	-2.451		-5.619	-5.621	-5.024	-7.663		-35.437
	8815_Estragole	Estragole	8815		-5.349	-5.321	-5.555	-4.738		-4.895	-4.411	-0.457	-4.621		-35.347
	6549_S-Linalool	S-Linalool	6549		-4.44	-3.147	-4.255	-3.749		-4.233	-4.773	-5.166	-4.768		-34.531
	7793_S-minus-Citronellol	S-minus-Citronellol	7793		-3.372	-2.652	-3.987	-3.366		-5.436	-5.203	-4.626	-5.768		-34.41
	643820_Nerol	Nerol	643820		-4.005	-4.246	-4.705	-3.532		-4.611	-4.693	-3.88	-4.692		-34.364
	439250_S-minus-Limonene	S-minus-Limonene	439250		-5.215	-5.408	-5.667	-5.269		-4.133	-3.938	-0.201	-3.597		-33.428
	1549026_E-Geranyl-acetate	E-Geranyl-acetate	1549026		-3.673	-4.136	-4.772	-3.765		-4.108	-4.586	-1.814	-5.887		-32.741
	1549025_Z-Neryl-acetate	Z-Neryl-acetate	1549025		-3.894	-4.13	-5.568	-4.296		-4.443	-3.929	-1.346	-4.956		-32.562
	637511_E-Cinnamaldehyde	E-Cinnamaldehyde	637511		-4.219	-4.393	-4.991	-4.72		-3.917	-4.092	-0.798	-5.146		-32.276
	16724_S-plus-Carvone	S-plus-Carvone	16724		-5.58	-4.388	-5.241	-5.018		-1.996	-4.092	-1.526	-4.249		-32.09
	12227246_3R6Z-Nerolidol	3R6Z-Nerolidol	12227246		-3.715	-1.506	-2.563	-2.147		-4.506	-5.694	-4.516	-6.999		-31.646
	101977_R-plus-Citronellol	R-plus-Citronellol	101977		-2.009	-2.557	-3.146	-3.499		-4.292	-5.282	-5.19	-5.648		-31.623
	5281553_Ocimene	Ocimene	5281553		-4.162	-3.933	-4.48	-3.594		-4.084	-3.107	-2.485	-4.506		-30.351
	11241545_3R6E-Nerolidol	3R6E-Nerolidol	11241545		-3.37	-2.015	-2.551	-3.012		-5.362	-3.619	-2.257	-7.885		-30.071
	9862_Sulcatone	Sulcatone	9862		-3.537	-3.088	-4.29	-3.419		-3.736	-3.58	-2.719	-3.431		-27.8
	61016_Melonal	Melonal	61016		-3.329	-2.75	-4.58	-2.857		-3.655	-3.623	-3.214	-3.733		-27.741
	7794_R-Citronellal	R-Citronellal	7794		-2.624	-3.706	-4.485	-3.564		-4.122	-4.161	-0.171	-4.828		-27.661
	8294_Linalyl-acetate	Linalyl-acetate	8294		-3.944	-4.143	-3.947	-4.031		-4.332	-4.647	2.196	-4.602		-27.45
	31276_Isoamyl-acetate	Isoamyl-acetate	31276		-4.323	-3.558	-3.667	-3.458		-3.807	-3.249	0.318	-3.324		-25.068
	7997_Propyl-acetate	Propyl-acetate	7997		-3.944	-3.382	-3.582	-3.56		-2.594	-2.652	-1.649	-2.697		-24.06
	8164_Octyl-acetate	Octyl-acetate	8164		0.734	0.268	-0.628	0.228		-4	-4.143	-1.45	-4.767		-13.758
	6128_Androstenedione	Androstenedione	6128		-7.789	-7.425	-10.001	-9.189		-6.15	-6.246	-5.558	-9.261
	91451_17alpha-Hydroxypregnenolone	17alpha-Hydroxypregnenolone	91451		-8.612	-7.564		-9.766		-5.196	-8.547		-9.722
	132971_Abiraterone	Abiraterone	132971		-9.185	-10.319		-9.63		-8.228	-9.703		-5.387
					CYP11A1	CYP17A1	CYP19A1	CYP21A2		CYP11A1	CYP17A1	CYP19A1	CYP21A2

## Sheet: top25_best_scores
	SDF file name	Molecule name	PubChem CID		SP 3N9Y	SP 3SWZ	SP 3S79	SP 4Y8W		XP 3N9Y	XP 3SWZ	XP 3S79	XP 4Y8W				SP 3N9Y	SP 3SWZ	SP 3S79	SP 4Y8W		XP 3N9Y	XP 3SWZ	XP 3S79	XP 4Y8W				SP 3N9Y	SP 3SWZ	SP 3S79	SP 4Y8W		XP 3N9Y	XP 3SWZ	XP 3S79	XP 4Y8W		Molecule	Sum
					CYP11A1	CYP17A1	CYP19A1	CYP21A2		CYP11A1	CYP17A1	CYP19A1	CYP21A2				CYP11A1	CYP17A1	CYP19A1	CYP21A2		CYP11A1	CYP17A1	CYP19A1	CYP21A2				CYP11A1	CYP17A1	CYP19A1	CYP21A2		CYP11A1	CYP17A1	CYP19A1	CYP21A2
	1742210_Caryophyllene-oxide	Caryophyllene-oxide	1742210		-7.55	-7.11	-8.249	-7.431		-5.975	-5.439	-6.03	-7.374		Removal of lowest scoring compounds		-7.55	-7.11	-8.249	-7.431		-5.975	-5.439	-6.03	-7.374		Hiding numbers, keeping color sceme		-7.55	-7.11	-8.249	-7.431		-5.975	-5.439	-6.03	-7.374		Caryophyllene-oxide	-55.158
	65575_plus-Cedrol	plus-Cedrol	65575		-7.118	-6.821	-8.185	-7.342		-6.382	-5.308	-5.957	-6.302				-7.118	-6.821	-8.185	-7.342		-6.382	-5.308	-5.957	-6.302				-7.118	-6.821	-8.185	-7.342		-6.382	-5.308	-5.957	-6.302		(+)-Cedrol	-53.415
	11858788_Epiglobulol	Epiglobulol	11858788		-7.062	-6.45	-8.094	-7.395		-5.487	-4.932	-6.138	-7.045				-7.062	-6.45	-8.094	-7.395		-5.487		-6.138	-7.045				-7.062	-6.45	-8.094	-7.395		-5.487		-6.138	-7.045		Epiglobulol	-52.603
	1549992_ Bisabolol	Bisabolol	1549992		-7.3	-5.446	-6.42	-7.065		-5.125	-5.602	-5.813	-7.882				-7.3		-6.42	-7.065		-5.125	-5.602	-5.813	-7.882				-7.3		-6.42	-7.065		-5.125	-5.602	-5.813	-7.882		Bisabolol	-50.653
	6989_Thymol	Thymol	6989		-6.905	-6.828	-6.608	-6.766		-5.487	-5.049	-4.226	-5.32				-6.905	-6.828	-6.608	-6.766		-5.487	-5.049		-5.32				-6.905	-6.828	-6.608	-6.766		-5.487	-5.049		-5.32		Thymol	-47.189
	10364_Carvacrol	Carvacrol	10364		-7.284	-6.13	-6.9	-7.245		-3.66	-5.367	-5.029	-5.474				-7.284	-6.13	-6.9	-7.245			-5.367	-5.029	-5.474				-7.284	-6.13	-6.9	-7.245			-5.367	-5.029	-5.474		Carvacrol	-47.089
	15406_Fenchol	Fenchol	15406		-6.937	-5.979	-6.578	-6.101		-4.897	-4.493	-6.213	-5.443				-6.937		-6.578	-6.101				-6.213	-5.443				-6.937		-6.578	-6.101				-6.213	-5.443		Fenchol	-46.641
	14896_beta-Pinene	beta-Pinene	14896		-6.237	-6.303	-6.824	-6.265		-5.173	-4.564	-5.391	-5.657				-6.237	-6.303	-6.824	-6.265		-5.173		-5.391	-5.657				-6.237	-6.303	-6.824	-6.265		-5.173		-5.391	-5.657		beta-Pinene	-46.414
	87839_S-cis-Verbenol	S-cis-Verbenol	87839		-7.201	-5.816	-6.058	-6.131		-5.423	-4.381	-6.472	-4.841				-7.201		-6.058	-6.131		-5.423		-6.472					-7.201		-6.058	-6.131		-5.423		-6.472			(S)-cis-Verbenol	-46.323
	519382_Dihydro-beta-ionone	Dihydro-beta-ionone	519382		-6.179	-5.605	-6.102	-5.766		-5.297	-4.92	-6.464	-5.89				-6.179		-6.102			-5.297		-6.464	-5.89				-6.179		-6.102			-5.297		-6.464	-5.89		Dihydro-beta-ionone	-46.223
	16666_L-Menthol	L-Menthol	16666		-6.549	-6.2	-6.581	-6.334		-4.799	-4.523	-5.645	-5.356				-6.549	-6.2	-6.581	-6.334				-5.645	-5.356				-6.549	-6.2	-6.581	-6.334				-5.645	-5.356		L-Menthol	-45.987
	62346_Bisabolene	Bisabolene	62346		-6.196	-6.18	-6.791	-6.53		-5.245	-5.303	-2.552	-6.641				-6.196	-6.18	-6.791	-6.53		-5.245	-5.303		-6.641				-6.196	-6.18	-6.791	-6.53		-5.245	-5.303		-6.641		Bisabolene	-45.438
	7463_p-Cymene	p-Cymene	7463		-6.152	-6.317	-6.712	-6.313		-4.852	-4.518	-5.522	-4.618				-6.152	-6.317	-6.712	-6.313				-5.522					-6.152	-6.317	-6.712	-6.313				-5.522			p-Cymene	-45.004
	443162_S-minus-alpha-Terpineol	S-minus-alpha-Terpineol	443162		-6.61	-5.897	-5.751	-5.732		-4.883	-4.375	-5.652	-5.842				-6.61							-5.652	-5.842				-6.61							-5.652	-5.842		(S)-(-)-alpha-Terpineol	-44.742
	10887971_plus-Sabinene	plus-Sabinene	10887971		-6.332	-6.202	-6.579	-6.173		-4.829	-4.23	-4.644	-5.702				-6.332	-6.202	-6.579	-6.173					-5.702				-6.332	-6.202	-6.579	-6.173					-5.702		(+)-Sabinene	-44.691
	440968_minus-alpha-Pinene	minus-alpha-Pinene	440968		-6.177	-6.071	-6.559	-6.065		-5.221	-4.337	-5.023	-5.147				-6.177	-6.071	-6.559	-6.065		-5.221		-5.023	-5.147				-6.177	-6.071	-6.559	-6.065		-5.221		-5.023	-5.147		(-)-alpha-Pinene	-44.6
	11463_Terpinolene	Terpinolene	11463		-5.979	-6.253	-6.556	-6.04		-4.599	-4.352	-5.02	-5.662					-6.253	-6.556	-6.04				-5.02	-5.662					-6.253	-6.556	-6.04				-5.02	-5.662		Terpinolene	-44.461
	111037_alpha-Terpinyl-acetate	alpha-Terpinyl-acetate	111037		-5.827	-5.258	-6.972	-5.577		-5.241	-4.931	-5.189	-5.415						-6.972			-5.241		-5.189	-5.415						-6.972			-5.241		-5.189	-5.415		alpha-Terpinyl-acetate	-44.41
	1201518_L-Borneol	L-Borneol	1201518		-6.826	-5.612	-6.567	-6.373		-2.919	-4.477	-7.07	-4.559				-6.826		-6.567	-6.373				-7.07					-6.826		-6.567	-6.373				-7.07			L-Borneol	-44.403
	7460_alpha-Fellandrene	alpha-Fellandrene	7460		-6.174	-6.288	-6.68	-5.931		-4.33	-4.374	-5.191	-5.374				-6.174	-6.288	-6.68					-5.191	-5.374				-6.174	-6.288	-6.68					-5.191	-5.374		alpha-Fellandrene	-44.342
	7461_gamma-Terpinene	gamma-Terpinene	7461		-6.365	-6.204	-6.624	-6.26		-4.413	-4.398	-5.462	-4.399				-6.365	-6.204	-6.624	-6.26				-5.462					-6.365	-6.204	-6.624	-6.26				-5.462			gamma-Terpinene	-44.125
	6616_Camphene	Camphene	6616		-6.039	-6.231	-6.782	-6.178		-4.387	-4.389	-5.362	-4.578				-6.039	-6.231	-6.782	-6.178				-5.362					-6.039	-6.231	-6.782	-6.178				-5.362			Camphene	-43.946
	1183_Vanillin	Vanillin	1183		-5.916	-5.892	-6.705	-5.658		-4.783	-4.831	-5.701	-4.394						-6.705					-5.701							-6.705					-5.701			Vanillin	-43.88
	442501_R-plus-alpha-Terpineol	R-plus-alpha-Terpineol	442501		-6.442	-5.913	-6.096	-5.721		-3.327	-4.366	-5.189	-6.434				-6.442		-6.096					-5.189	-6.434				-6.442		-6.096					-5.189	-6.434		(R)-(+)-alpha-Terpineol	-43.488
	31244_p-Anisaldehyde	p-Anisaldehyde	31244		-6.132	-5.733	-6.708	-5.743		-5.281	-3.751	-5.422	-4.646				-6.132		-6.708			-5.281		-5.422					-6.132		-6.708			-5.281		-5.422			p-Anisaldehyde	-43.416
	6128_Androstenedione	Androstenedione	6128		-7.789	-7.425	-10.001	-9.189		-6.15	-6.246	-5.558	-9.261				-7.789	-7.425	-10.001	-9.189		-6.15	-6.246	-5.558	-9.261				-7.789	-7.425	-10.001	-9.189		-6.15	-6.246	-5.558	-9.261		Androstenedione
	91451_17alpha-Hydroxypregnenolone	17alpha-Hydroxypregnenolone	91451		-8.612	-7.564		-9.766		-5.196	-8.547		-9.722				-8.612	-7.564		-9.766		-5.196	-8.547		-9.722				-8.612	-7.564		-9.766		-5.196	-8.547		-9.722		17-alpha-Hydroxypregnenolone
	132971_Abiraterone	Abiraterone	132971		-9.185	-10.319		-9.63		-8.228	-9.703		-5.387				-9.185	-10.319		-9.63		-8.228	-9.703		-5.387				-9.185	-10.319		-9.63		-8.228	-9.703		-5.387		Abiraterone
																				-10		-10 kcal/mol															-10		-10 kcal/mol
																				-9		-9 kcal/mol															-9		-9 kcal/mol
																				-8		-8 kcal/mol															-8		-8 kcal/mol
																				-7		-7 kcal/mol															-7		-7 kcal/mol
																				-6		-6 kcal/mol															-6		-6 kcal/mol
																				-5		-5 kcal/mol										-5					-5		-5 kcal/mol
